# Supplementary material
Source: Springer Nature journal article supplement (https://www.springermedizin.de/resource/supplementary/12889_2012_4003_MOESM1_ESM.pdf/9491076)

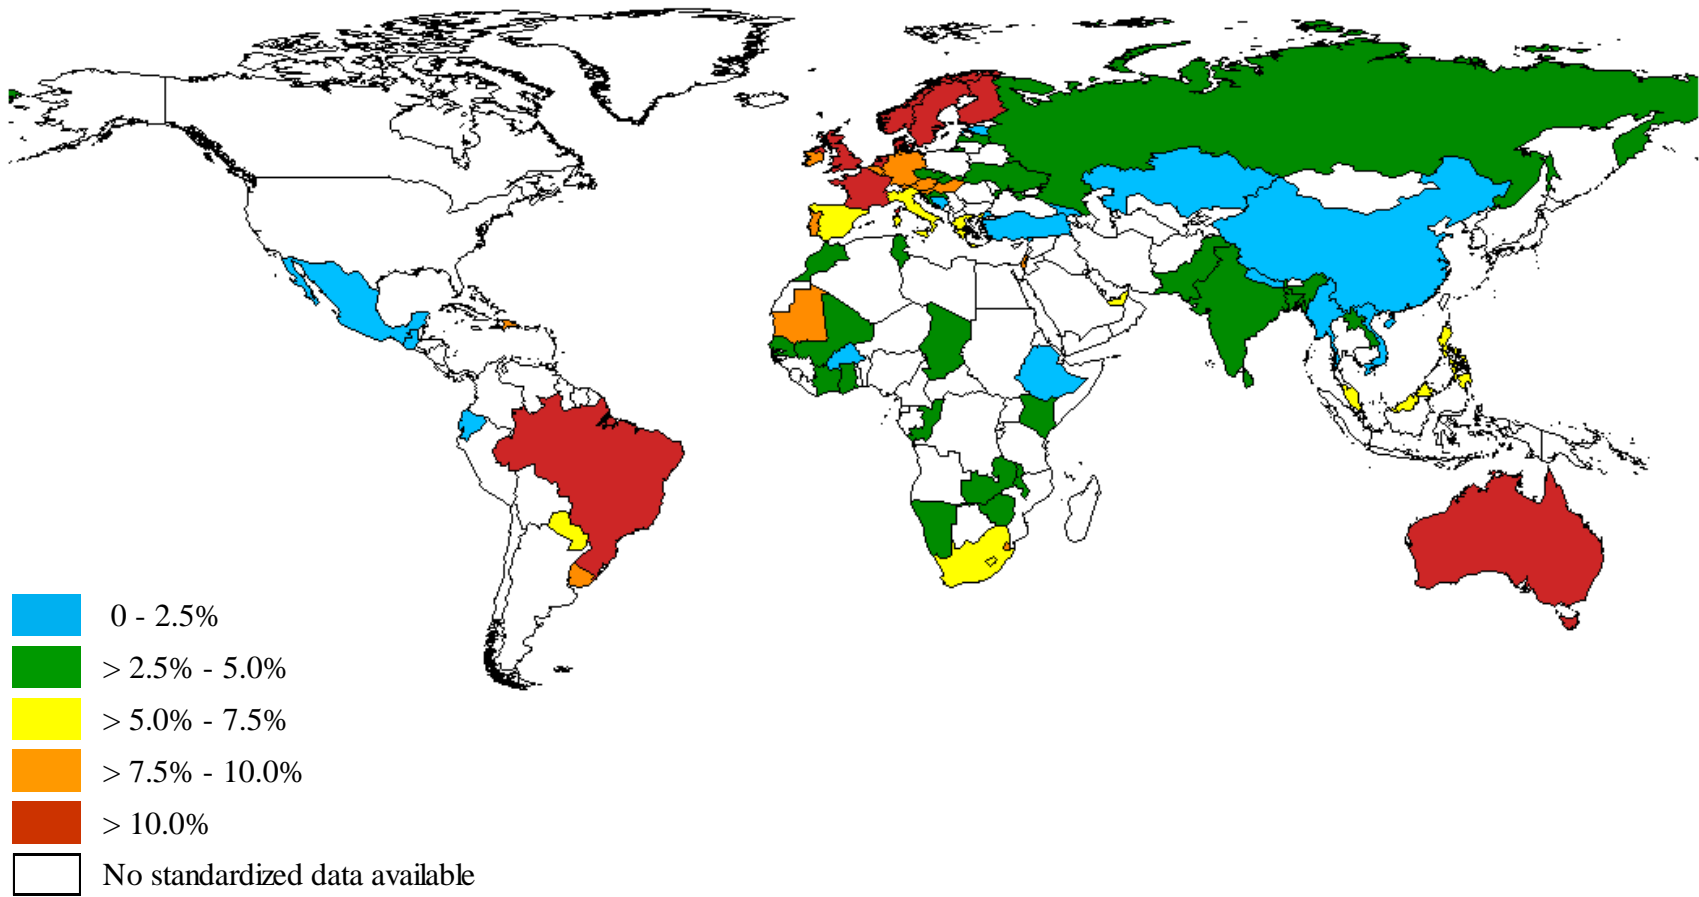

Supplement: MOESM1 [file 9491076]
